# Supplementary material for: Supramolecular photocatalysts constructed with a photosensitizer unit with two tridentate ligands for CO2 reduction
Source: Royal Society of Chemistry journal article supplement (doi:10.1039/c6fd00220j), 2017-01-01
Supplement: c6fd00220j1.pdf [file c6fd00220j1.pdf]

## Electronic Supplementary Information

*Supramolecular photocatalysts constructed with a photosensitizer unit having two tridentate ligands for CO<sub>2</sub> reduction*

Yusuke Tamaki and Osamu Ishitani\*

Department of Chemistry, School of Science, Tokyo Institute of Technology, 2-12-1-NE-1, Ookayama, Meguro-ku, Tokyo, 152-8550, Japan.

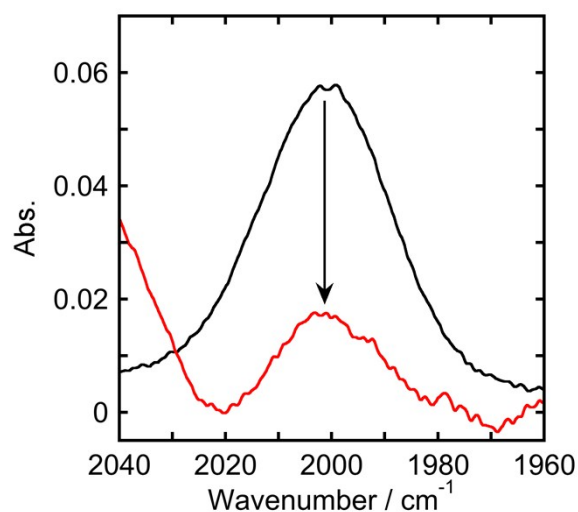

Figure S1. IR spectra before (black line) and after (red line) electrolysis of  $[\text{Ru}(\text{mtpy})(\text{Clbpy})(\text{CO})]^{2+}$ . The complex (1 mM) dissolved in an Ar-saturated DMA solution, containing  $\text{Et}_4\text{BF}_4$  (0.1 M) as an electrolyte, was reduced at  $-1.45$  V for 15 min using a reticulated vitreous carbon working electrode and a  $\text{Ag}/\text{AgNO}_3$  reference electrode.

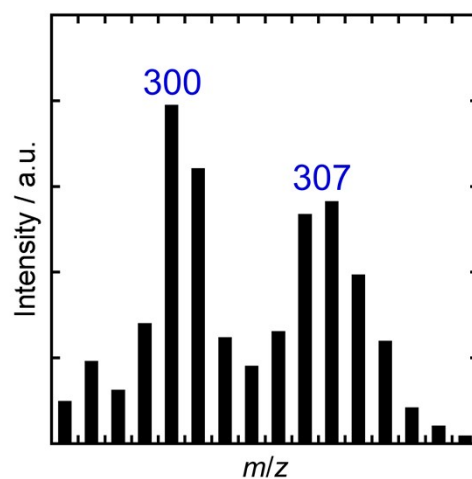

Figure S2. ESI-Mass spectrum of  $[\text{Ru}(\text{mtpy})(\text{Clbpy})(\text{CO})]^{2+}$  after controlled potential electrolysis at  $-1.45$  V for 15 min in a DMA solution containing  $\text{Et}_4\text{BF}_4$  (0.1 M) as an electrolyte (mobile phase: acetonitrile). The peak at  $m/z = 300$  is attributed to  $[\text{Ru}(\text{mtpy})(\text{Clbpy})(\text{CO})]^{2+}$  and that at  $m/z = 307$  is attributable to  $[\text{Ru}(\text{mtpy})(\text{Clbpy})(\text{NCMe})]^{2+}$ .
